# Supplementary material
Source: Springer Nature journal article supplement (https://www.springermedizin.de/resource/supplementary/12913_2012_2827_MOESM1_ESM.pdf/9531460)

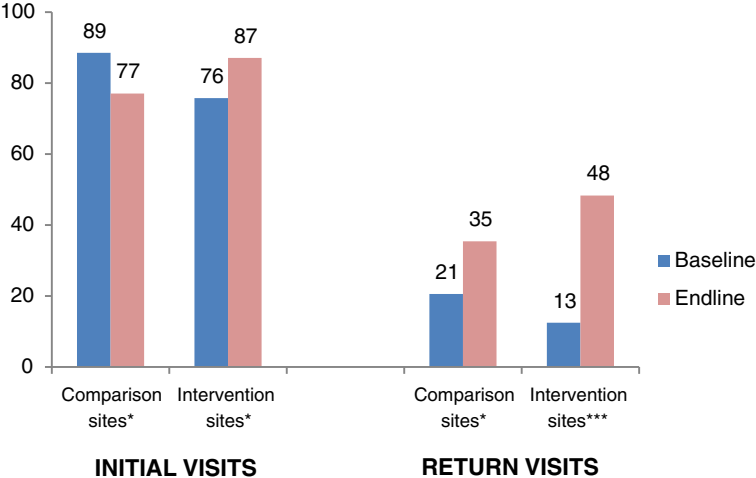

n=191 at baseline and 196 at endline

\*p<0.05 \*\*\*p<.0001

Supplement: MOESM1 [file 9531460]
